1 **A reference single-cell transcriptomic atlas of human skeletal muscle tissue**  
2 **reveals bifurcated muscle stem cell populations**

3  
4 Andrea J. De Micheli<sup>1,3</sup>, Jason A. Spector<sup>1,2</sup>, Olivier Elemento<sup>3</sup>, and Benjamin D. Cosgrove<sup>1,%</sup>

5  
6 <sup>1</sup>Meinig School of Biomedical Engineering, Cornell University, Ithaca, NY, 14853, USA

7 <sup>2</sup>Division of Plastic Surgery, Weill Cornell Medical College, New York, NY, 10021, USA

8 <sup>3</sup>Englander Institute for Precision Medicine, Weill Cornell Medicine, New York, NY, 10021, USA

9

10 %Corresponding author:

11 Benjamin D. Cosgrove

12 Meinig School of Biomedical Engineering, Cornell University

13 159 Weill Hall, 526 Campus Road, Ithaca, NY 14853, USA

14 tel: +1-607-255-7271 | email: bdc68@cornell.edu

15

16 **Abstract:** Single-cell RNA-sequencing (scRNA-seq) facilitates the unbiased  
17 reconstruction of multicellular tissue systems in health and disease. Here, we present a  
18 curated scRNA-seq dataset of human muscle samples from 10 adult donors with diverse  
19 anatomical locations. We integrated ~22,000 single-cell transcriptomes using Scanorama  
20 to account for technical and biological variation and resolved 16 distinct populations of  
21 muscle-resident cells using unsupervised clustering of the data compendium. These cell  
22 populations included muscle stem/progenitor cells (MuSCs), which bifurcated into  
23 discrete “quiescent” and “early-activated” MuSC subpopulations. Differential expression  
24 analysis identified transcriptional profiles altered in the activated MuSCs including genes  
25 associated with ageing, obesity, diabetes, and impaired muscle regeneration, as well as  
26 long non-coding RNAs previously undescribed in human myogenic cells. Further, we  
27 modeled ligand-receptor cell-communication interactions and observed enrichment of the  
28 TWEAK-FN14 pathway in activated MuSCs, a characteristic signature of muscle wasting  
29 diseases. In contrast, the quiescent MuSCs have enhanced expression of the *EGFR*  
30 receptor, a recognized human MuSC marker. This work provides a new technical  
31 resource to examine human muscle tissue heterogeneity and identify potential targets in  
32 MuSC diversity and dysregulation in disease contexts.

## 33 **Introduction**

34 Skeletal muscles are essential to daily functions such as locomotion, respiration, and  
35 metabolism. Upon damage, resident muscle stem cells (MuSCs) repair the tissue in  
36 coordination with supporting non-myogenic cell types such as immune cells, fibroblasts,  
37 and endothelial cells (Bentzinger et al., 2013). However, with age and disease, the repair  
38 capacity of MuSCs declines, leading to complications such as fibrotic scarring, reduced  
39 muscle mass and strength (Blau et al., 2015; Järvinen et al., 2014), fat accumulation and  
40 decreased insulin sensitivity (Addison et al., 2014), all of which severely affect mobility  
41 and quality of life (Larsson et al., 2018).

42 Human MuSCs are defined by the expression of the paired box family transcription  
43 factor PAX7 and can be isolated using various surface marker proteins including  $\beta$ 1-  
44 integrin (CD29), NCAM (CD56), EGFR, and CD82 to varying purities (Pisani et al., 2010;  
45 Charville et al., 2015; Alexander et al., 2016; Uezumi et al., 2016; Wang et al., 2019).  
46 With ageing, human MuSCs exhibit a heterogeneous expression of the senescence  
47 marker p16<sup>Ink4a</sup> and accumulate other cell-intrinsic alterations in myogenic gene  
48 expression programs, cell cycle control, and metabolic regulation (Sousa-Victor, et al.,  
49 2014; Blau, et al., 2015). However, given their varied molecular and functional states, our  
50 understanding of MuSCs in adult human muscle tissue remains incompletely defined. In  
51 addition, cellular coordination in the regulation of human muscle homeostasis and  
52 regeneration remains poorly understood due to the lack of experimentally tractable  
53 models with multiple human muscle cell types. Given these challenges we posited that  
54 an unbiased single-cell reference atlas of skeletal muscle could provide a useful  
55 framework to explore MuSC variability and communication in adult humans.

56 Here, we deeply profiled the transcriptome of thousands of individual MuSCs and  
57 muscle-resident cells from diverse adult human muscle samples using single-cell RNA-  
58 sequencing (scRNA-seq). After integrating these donor datasets to conserve biological  
59 information and overcome technical variation, we resolved two subpopulations of MuSCs  
60 with distinct gene expression signatures. Using differential gene expression analysis and  
61 ligand-receptor interaction modeling, we extend the known repertoire of human MuSC  
62 gene expression programs, suggesting new regulatory programs that may be associated  
63 with human MuSC activation, as well as features of human muscle aging and disease.

64

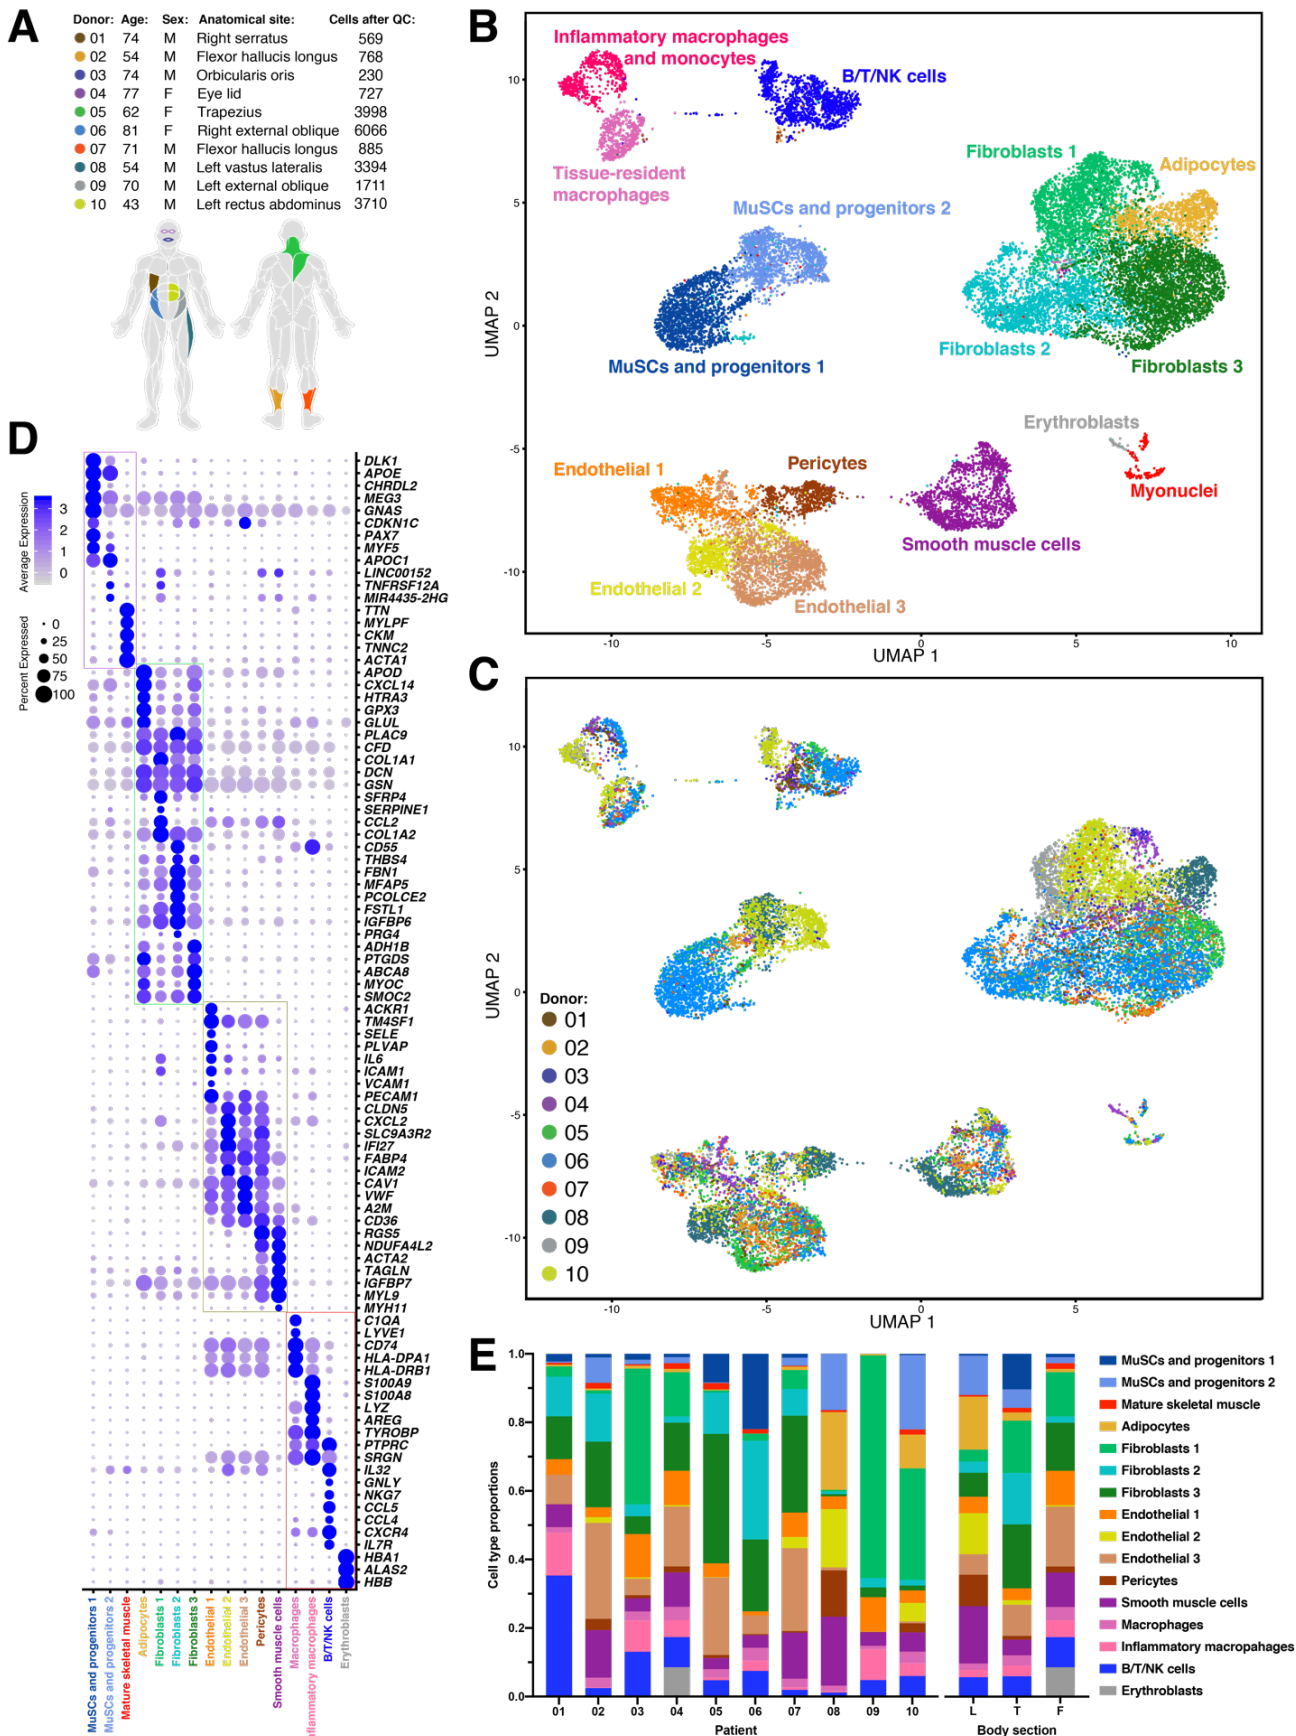

65 **Figure 1** (previous page). **Single-cell transcriptomic map of human muscle tissue biopsies.**  
66 **(A)** Metadata (sex, age, anatomical site, and the number of single-cell transcriptomes after quality  
67 control (QC) filtering) from n=10 donors. Colors indicate sample anatomical sites. **(B)** Scanorama-  
68 integrated and batch-effect corrected transcriptomic atlas revealing a consensus description of  
69 16 distinct muscle-tissue cell populations. **(C)** Transcriptomic atlas colored by donor and  
70 anatomical location. **(D)** Dot-plot showing differentially expressed genes that distinguish the cell  
71 populations. Grouped in four compartments: muscle, endothelial/vascular, stromal, and immune.  
72 **(E)** Cell type proportions as annotated in (B) across the 10 donors and grouped by body sections.  
73 L = leg (donors 02, 07, 08), T = trunk (donors 01, 05, 06, 09, 10), F = face (donors 03, 04).  
74

## 75 **Results**

### 76 ***Collection and integration of a diverse human scRNA-seq dataset.***

77 We used scRNA-seq to collect and annotate a single-cell transcriptomic dataset of  
78 diverse adult human muscle samples under homeostatic conditions. The muscle samples  
79 were from surgically discarded tissue from n=10 donors (range: 41 to 81 years old)  
80 undergoing reconstructive procedures and originating from a wide variety of anatomical  
81 sites in otherwise healthy patients (**Fig. 1A**). Each sample was ~50 mg after removal of  
82 extraneous fat and connective tissue. Muscle samples were enzymatically digested into  
83 single-cell suspensions and independently loaded into the 10X Chromium system. All  
84 together, we collected over 22,000 human muscle single-cell transcriptomes (2206 ±  
85 1961 cells per dataset) into a single data compendium. Using unsupervised clustering,  
86 we resolved 16 types of cells of immune, vascular, and stromal origin, as well as two  
87 distinct subpopulations of MuSCs and some myofiber myonuclei (**Fig. 1B**).

88 Given important differences in anatomical site, donor health history, age, sex, and  
89 surgical procedures, the muscle samples were highly heterogeneous in terms of cell-type  
90 diversity and underlying gene expression profiles. Comparing the resulting scRNA-seq  
91 datasets is therefore a challenge that we addressed using recently developed  
92 bioinformatic integration methods (Stuart et al., 2019ab; Hie et al., 2019). Our goal was  
93 to assemble a unified dataset of human muscle tissue that faithfully conserved sources  
94 of biological variability such as donor, anatomical location, and cell composition  
95 heterogeneity, while accounting for technical biases. We tested four different scRNA-seq  
96 data integration methods (**Fig. S1**) and found that Scanorama (Hie et al., 2019) followed  
97 by scaling the output by regressing against the library chemistry technical variable (“10X  
98 chemistry”) and the number of genes detected per single-cell best satisfied this goal.  
99 Detailed information on our methodology is provided in **Fig. S1**. After integrating the 10

100 datasets, we noted remarkable consistency amid cell types across donors (**Fig. 1C, 1E**);  
101 owing to the robustness of scRNA-seq technology, the bioinformatic method chosen, and  
102 our sample preparation protocol. Differential gene expression analysis between the 16  
103 distinct subpopulations identified an extensive set of unique markers that we grouped into  
104 4 categories (**Fig. 1D**).

105

#### 106 ***scRNA-seq resolves the cellular diversity of human muscle and novel markers.***

107 We annotated and interpretation the consensus cell atlas (**Fig. 1B,D**) into cell type sub-  
108 populations as follows. We identify four types of stromal cells starting with adipocytes  
109 found to be expressing apolipoprotein D (*APOD*) (Muffat et al., 2010), the brown fat tissue  
110 adipokine *CXCL14* (Cereijo et al., 2018), *GPX3*, and *GLUL*. Among the 3 other  
111 subpopulations of fibroblast-like cells, Fibroblasts 1 express high levels of collagen 1  
112 (*COL1A1*), *SFRP4*, *SERPINE1*, and *CCL2*; Fibroblasts 2 express fibronectin (*FBN1*), the  
113 microfibril-associated glycoprotein *MFAP5*, and *CD55* known to be expressed by  
114 synoviocytes (Karpus et al., 2015); and Fibroblast 3 is mainly characterized by *SMOC2*,  
115 a marker of tendon fibroblasts (Swanson et al., 2019).

116 We also identify 5 types of vascular cells, including 3 endothelial subpopulations,  
117 and a subpopulation of pericytes and smooth muscle cells (SMCs). Pericytes and SMCs  
118 express the canonical markers *RGS5* and *MYH11*. Endothelial 1 express E-selectin  
119 (*SELE*), *IL6*, *ICAM1*, *VCAM1*. These genes are upregulated at sites of inflammation to  
120 facilitate immune cell recruitment, suggesting this Endothelial 1 cell population may be  
121 involved in homeostatic muscle tissue remodeling (Watson et al., 1996; Goncharov et al.,  
122 2017). Endothelial 2 cells are distinguished by expressing high levels of claudin-5  
123 (*CLDN5*), *ICAM2*, and the chemokine *CXCL2*. Endothelial 3 express high levels of the  
124 platelet-recruiting Von Willebrand Factor (*VWF*) and caveolin-1 (*CAV1*), a protein known  
125 to regulate cholesterol metabolism, atherosclerosis progression, as well as MuSC  
126 activation (Fernández-Hernando et al., 2010, Volonte et al., 2004).

127 We also noted two types myeloid immune cells. First, tissue-resident and anti-  
128 inflammatory macrophages which express *CD74* and histocompatibility complex *HLA*  
129 proteins. Second, activated macrophages and monocytes that express inflammatory  
130 markers such as *S100A9* (calgranulin) and *LYZ* (lysozyme). Moreover, *S100A9* transcript

131 abundance levels have been shown to be a feature in ageing and chronic inflammation  
132 (Swindell et al., 2013). We also identified a pool of T/B lymphocytes and NK cells  
133 characterized by *IL7R* and *NKG7*, respectively, as well as a small subset of *HBA1*<sup>+</sup>  
134 erythroblasts.

135 Finally, we identified two subpopulations of MuSCs (henceforth called “MuSC1”  
136 and “MuSC2”). MuSC1 highly expressed the canonical myogenic transcription factor  
137 *PAX7* (Kuang et al., 2006), as well as chordin-like protein 2 (*CHRD2*) and Delta-like non-  
138 canonical Notch ligand 1 (*DLK1*). *CHRD2* has been shown previously to be  
139 expressed in freshly isolated quiescent human MuSCs (Charville et al., 2015), though its  
140 function is still to be understood. *DLK1* is an inhibitor of adipogenesis whose role in  
141 muscle has mainly been recognized in the embryo but remains controversial in adult  
142 muscle regeneration (Waddell et al., 2010; Andersen et al., 2013; Zhang et al., 2019). In  
143 contrast to MuSC1, MuSC2 expressed lower levels of *PAX7* but maintain expression of  
144 *MYF5* (a marker of activated MuSCs) and *APOC1* (**Fig. 2B**). Interestingly, the MuSC2  
145 population also had elevated expression of two long non-coding RNAs (lncRNAs),  
146 *LINC00152* and *MIR4435-2HG*. lncRNAs are involved in regulating myogenesis (Hagan  
147 et al., 2017). Surprisingly, we detected low expression of the myogenic commitment  
148 factors *MYOD1* and *MYOG* (**Fig. 2B**), in contrast to scRNA-seq analyses of adult mouse  
149 muscle (Dell’Orso et al., 2019; De Micheli et al., 2019). These observations suggest that  
150 the MuSC1 and MuSC2 populations are both comprised largely of muscle stem cells, not  
151 committed myogenic progenitors. In addition, we noted that “Myonuclei” population (**Fig.**  
152 **1B**) was enriched for myosin light chain (*MYLFP*), skeletal alpha-actin (*ATCA1*), and  
153 troponin C (*TNNC2*), proteins involved in muscle contraction. This multiple-donor scRNA-  
154 seq atlas highlights the cellular diversity of human muscle tissue and revealed two distinct  
155 MuSC subpopulations along with specific myogenic expression programs.

156

### 157 ***Homeostatic human muscle contains two distinct MuSC subpopulations.***

158 Next we examined genes that were differentially expressed between the MuSC1 and  
159 MuSC2 subpopulations and the biological processes that characterize them (**Fig. 2A-B**).  
160 The MuSC1 subpopulation was enriched for *PAX7*, *DLK1*, and *CHRD2*, as well as for  
161 the cyclin-dependent kinase inhibitor *CKDN1C* (encoding P57<sup>KIP2</sup>), suggesting that these

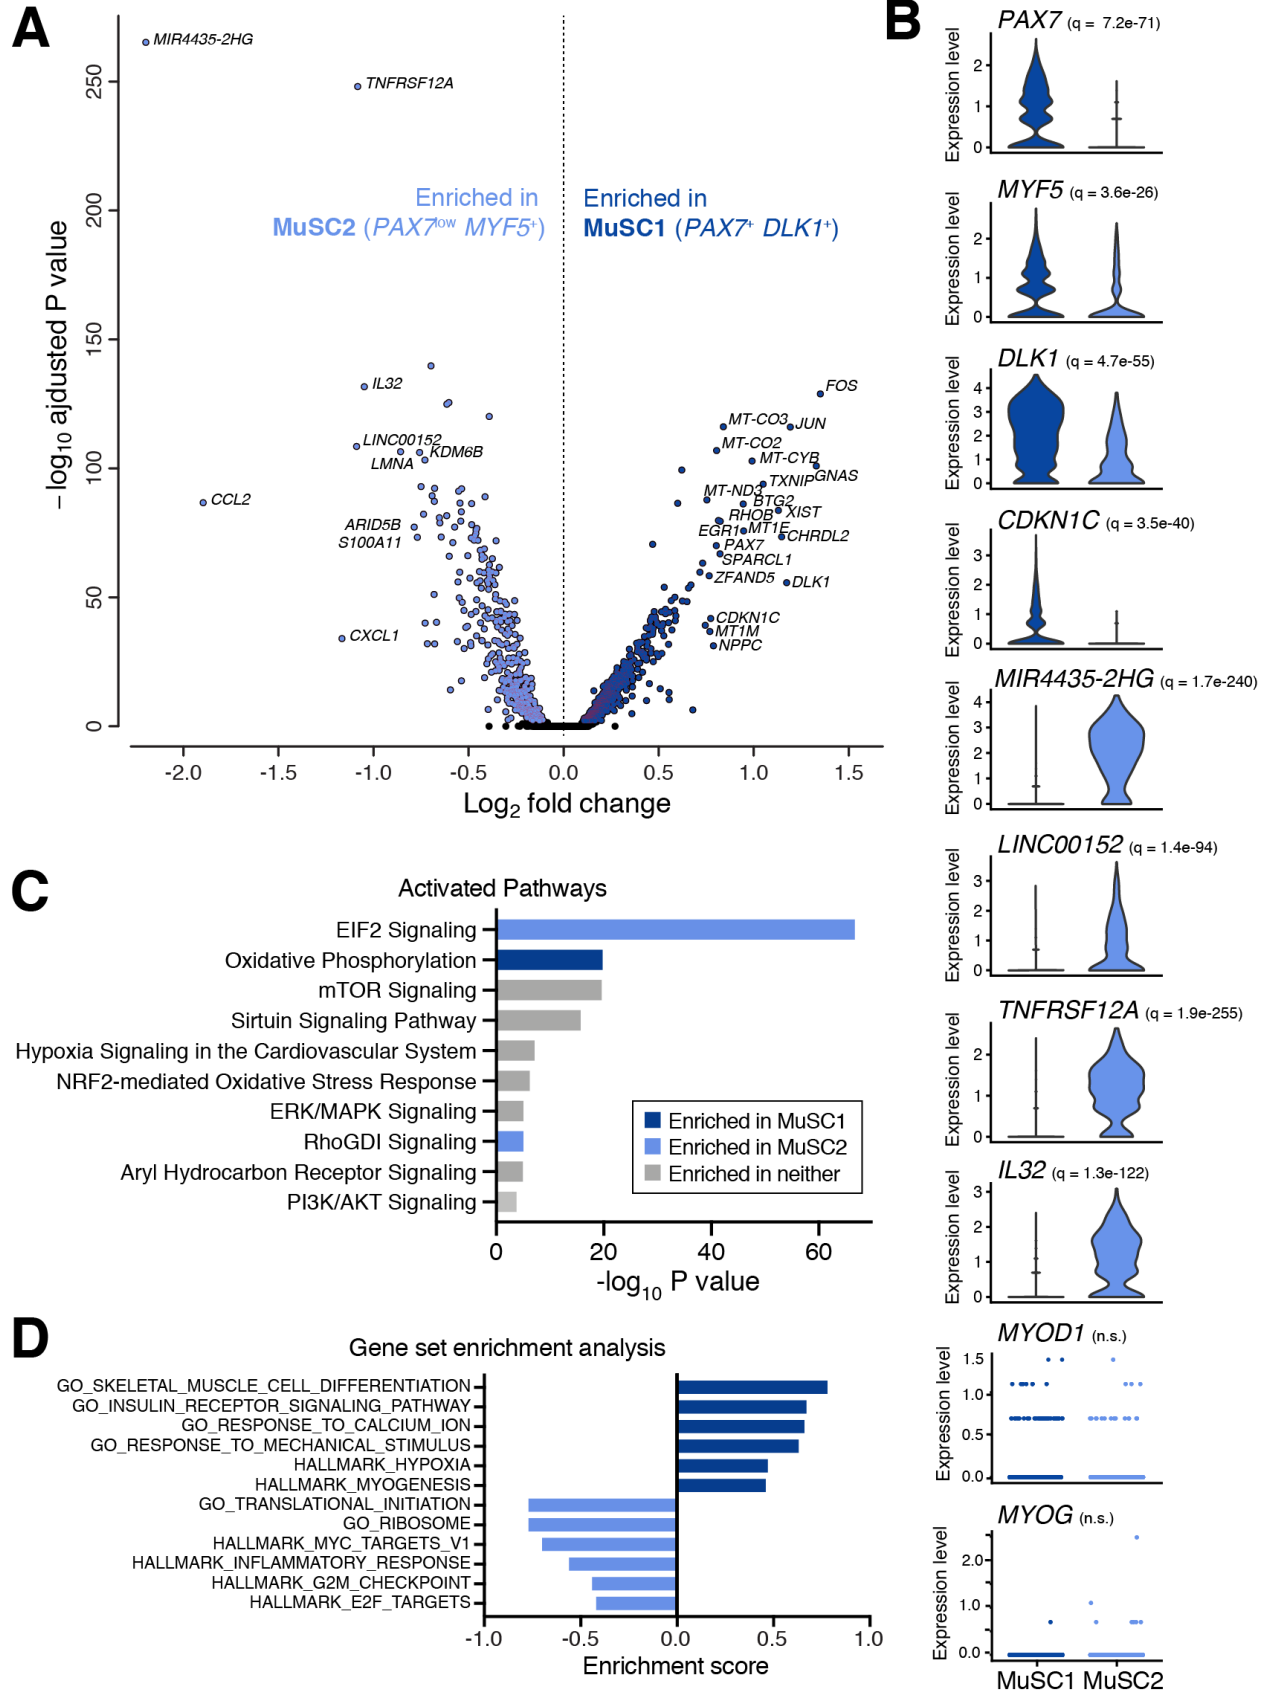

163 **Figure 2.** (previous page) **Gene expression and pathway analysis comparison between two**  
164 **MuSC subpopulations. (A)** Volcano plot from comparing transcript levels between all cells within  
165 the “MuSC1” and “MuSC2” subpopulations. Log<sub>2</sub> fold-change in normalized gene expression  
166 versus -log<sub>10</sub>-adjusted p-value plotted. Differentially expressed genes (adjusted p value < 0.05)  
167 are colored dark or light blue (based on their enrichment in MuSC1 or MuSC2, respectively).  
168 Genes with log<sub>2</sub> fold-change > 0.75 are labeled. **(B)** Normalized expression values of select  
169 differentially expressed genes. *q*-values reported in inset. **(C)** Top activated canonical pathways  
170 by Ingenuity Pathway Analysis based on differentially expressed genes and ranked by p value.  
171 Pathways significantly enriched in either population with |z-score| > 1 are indicated in blue. **(D)**  
172 Select gene ontology (GO) terms and hallmark pathways enriched between the MuSC  
173 subpopulations as identified by gene set enrichment analysis (GSEA) and ranked by enrichment  
174 score (ES).  
175

176 cells are quiescent and not cycling. In addition, this subpopulation expresses the  
177 transcription factor *BTG2*, which was identified in mouse to be enriched in quiescent  
178 MuSCs (De Micheli et al., 2019). We also note that the MuSC1 subpopulation expressed  
179 elevated levels of mitochondrial genes as well as *FOS*, *JUN*, and *ERG1*. Upregulation of  
180 these genes has been shown to be potential artefacts of the enzymatic digestion during  
181 the sample preparation (van den Brink et al., 2017).

182 The MuSC2 subpopulation was enriched for multiple markers of inflammation  
183 including *CCL2*, *CXCL1*, *IL32*, and surface receptor *TNFRSF12/FN14*. In particular,  
184 *CCL2* and *CXCL1* are inflammatory cytokines known to be upregulated in muscle repair,  
185 exercise, and fat metabolism (Harmon et al., 1985; Pedersen et al., 2012). In addition,  
186 *IL32* has been shown to have inflammatory properties in human obesity (Catalán et al.,  
187 2017) and have a negative impact on insulin sensitivity and myogenesis (Davegårdh et  
188 al., 2017), while *TNFRSF12/FN14* has been implicated in various muscle wasting  
189 diseases (Mittal et al., 2010; Enwere et al., 2014) and metabolic dysfunction (Sato et al.,  
190 2014). Furthermore, the MuSC2 population is enriched for ribosomal gene expression  
191 (e.g. *RPLP1* and *RPS6*; data not shown), indicating that these cells may have elevated  
192 translational mechanisms. Lastly, the MuSC1 population has enriched expression of the  
193 myogenic gene *PAX7* and, to a lesser extent, *MYF5*, compared the MuSC2 population.  
194 These observations suggest that MuSC1 is comprised of quiescent MuSCs and MuSC2  
195 is comprised of an early-activated MuSCs.

196 We performed Ingenuity Pathway Analysis (IPA) to compare biological processes  
197 differentially activated between the MuSC1 and MuSC2 populations. The IPA gene group  
198 “Oxidative Phosphorylation” is enriched in MuSC1 (Ryall et al., 2015), while “EIF2



199 Signaling”, associated with protein translation processes, is enriched in MuSC2 (**Fig. 2C**).  
200 Furthermore, Gene Set Enrichment Analysis (GSEA) also found MuSC1 to be enriched  
201 for “myogenesis”, “muscle cell differentiation”, “hypoxia”, and “response to mechanical  
202 stimulus” gene sets, consistent with the observation that these cells are both less  
203 differentiation and may have stress-associated gene induction due to tissue dissociation  
204 (van den Brink et al., 2017) (**Fig. 2D**). MuSC2 cells are enriched for “ribosome and  
205 translational initiation”, “MYC targets” and “E2F (cell proliferation)”, “G2M checkpoint (cell  
206 division)”, and “inflammation” gene sets, further supporting the interpretation that these  
207 cells may be in an early activated or partially differentiated state within an inflammatory  
208 environment (**Fig. 2D**). Taken together, these observations suggest that the MuSC1  
209 population is comprised of quiescent MuSCs, while the MuSC2 population is comprised  
210 of active, proliferating, and/or dysregulated MuSCs, with expression alterations  
211 associated with inflammation, ageing, and muscle wasting. Differentially expressed  
212 genes such as *IL32*, *CXCL1*, *CCL2*, and *TNFRSF12/FN14* may constitute a marker set  
213 for MuSC variation in chronic muscle inflammation in various pathologies.

214

215 ***Ligand-receptor interaction model identifies potential surface markers and cell-***  
216 ***communication channels in muscle pathologies.***

217 Given the distinct expression profiles between the MuSC1 and MuSC2 populations, we  
218 sought to identify genes that could facilitate surface antigen-based separation of these  
219 two human MuSC populations for prospective isolation strategies. We identified surface  
220 receptor genes that were differentially expressed between the MuSC1 and MuSC2  
221 populations, using a database of 542 human surface “receptor” genes (Ramilowski et al.,  
222 2015) (**Fig. 3A**). MuSC1 were exhibit elevated expression of *EGFR*, *ITGB1*, *FGFR4*,  
223 *SDC2*, as well as the three tetraspanins *CD81*, *CD82*, and *CD151*. EGFR is a recently  
224 established human MuSC marker and is required for basal-apical asymmetric cell division  
225 (Charville et al., 2015; Wang et al., 2019). The tetraspanin CD82 is also a recently  
226 recognized human MuSC maker (Alexander et al., 2016), while CD9 and CD81 have been  
227 identified to control muscle myoblast fusion (Charrin et al., 2013). Furthermore,  
228 Syndecans (SDCs) have been identified in mouse to be heterogeneously expressed on  
229 MuSCs and myoblasts during muscle repair (De Micheli et al., 2019) and have been

230 shown to form co-receptor complexes with integrin  $\beta 1$  (ITGB1) and FGFR4 upstream of  
231 signaling pathways regulating myogenesis (Pawlikowski et al., 2017). Only SDC4 and  
232 SDC3 have yet been identified to mark adult mouse MuSCs (Pisconti et al., 2012). In  
233 comparison, the MuSC2 population has elevated expression of *CD44* and  
234 *TNFRSF12/FN14* as previously noted. The CD44 receptor has been shown to regulate  
235 myoblast migration and fusion in mouse, but also mark MuSCs in osteoarthritis patients  
236 (Mylona et al., 2006; Scimeca et al., 2015).

237         Next, we used a ligand-receptor (LR) interaction model and a database of LR pairs  
238 (Ramilowski et al., 2015) to map cell signaling communication channels in human muscle  
239 and uncover differences between the MuSC1 and MuSC2 populations. The model also  
240 identifies interacting ligand(s) and is restricted to receptor genes is differentially  
241 expressed by a specific cell type within the consensus human muscle cell atlas (**Fig. 1B**).  
242 For each LR pair, the model calculates an interaction score from differentially expressed  
243 receptors on MuSCs and ligands expressed by other cell types. We identified 73 and 6  
244 significant LR interactions for the MuSC1 and MuSC2 populations, respectively (**Fig. 3**).  
245 Over one third of all interactions in the MuSC1 population involve the *EGFR* receptor,  
246 which has recently been shown to play a critical role in directing MuSC asymmetric  
247 division in regenerating muscle (Wang et al., 2019). A limited number of EGFR ligands  
248 have been identified in muscle repair. For example, amphiregulin (AREG) is secreted by  
249  $T_{reg}$  cells (Burzyn et al., 2013). According to our model findings, EGFR may also interact  
250 with ligands expressed by immune cells, such as with TGF- $\alpha$  (*TGFA*), heparin-binding EGF  
251 (*HBEGF*), amphiregulin (*AREG*), and epiregulin (*EREG*). Other EGFR ligands include  
252 brevican (*BCAN*), and betacellulin (*BTC*) produced by endothelial cells, ECM proteins  
253 fibulin 3 (*EFEMP1*), decorin (*DCN*), and tenascin C (*TNC*) expressed by fibroblasts, and  
254 FGF13, AHM, NRG4 and EGF, expressed by mature skeletal myofibers. We also detect  
255 seven interactions involving *NOTCH3* with a variety of ligands. Notch3 signaling is  
256 involved in maintaining MuSC quiescence, in particular through interaction with DLL4  
257 (Low et al. 2018), which we found differently expressed by endothelial cells along with  
258 *JAG2*. In addition, *NOTCH3* also interacts with the ECM protein thrombospondin-2  
259 (*THBS2*).

260

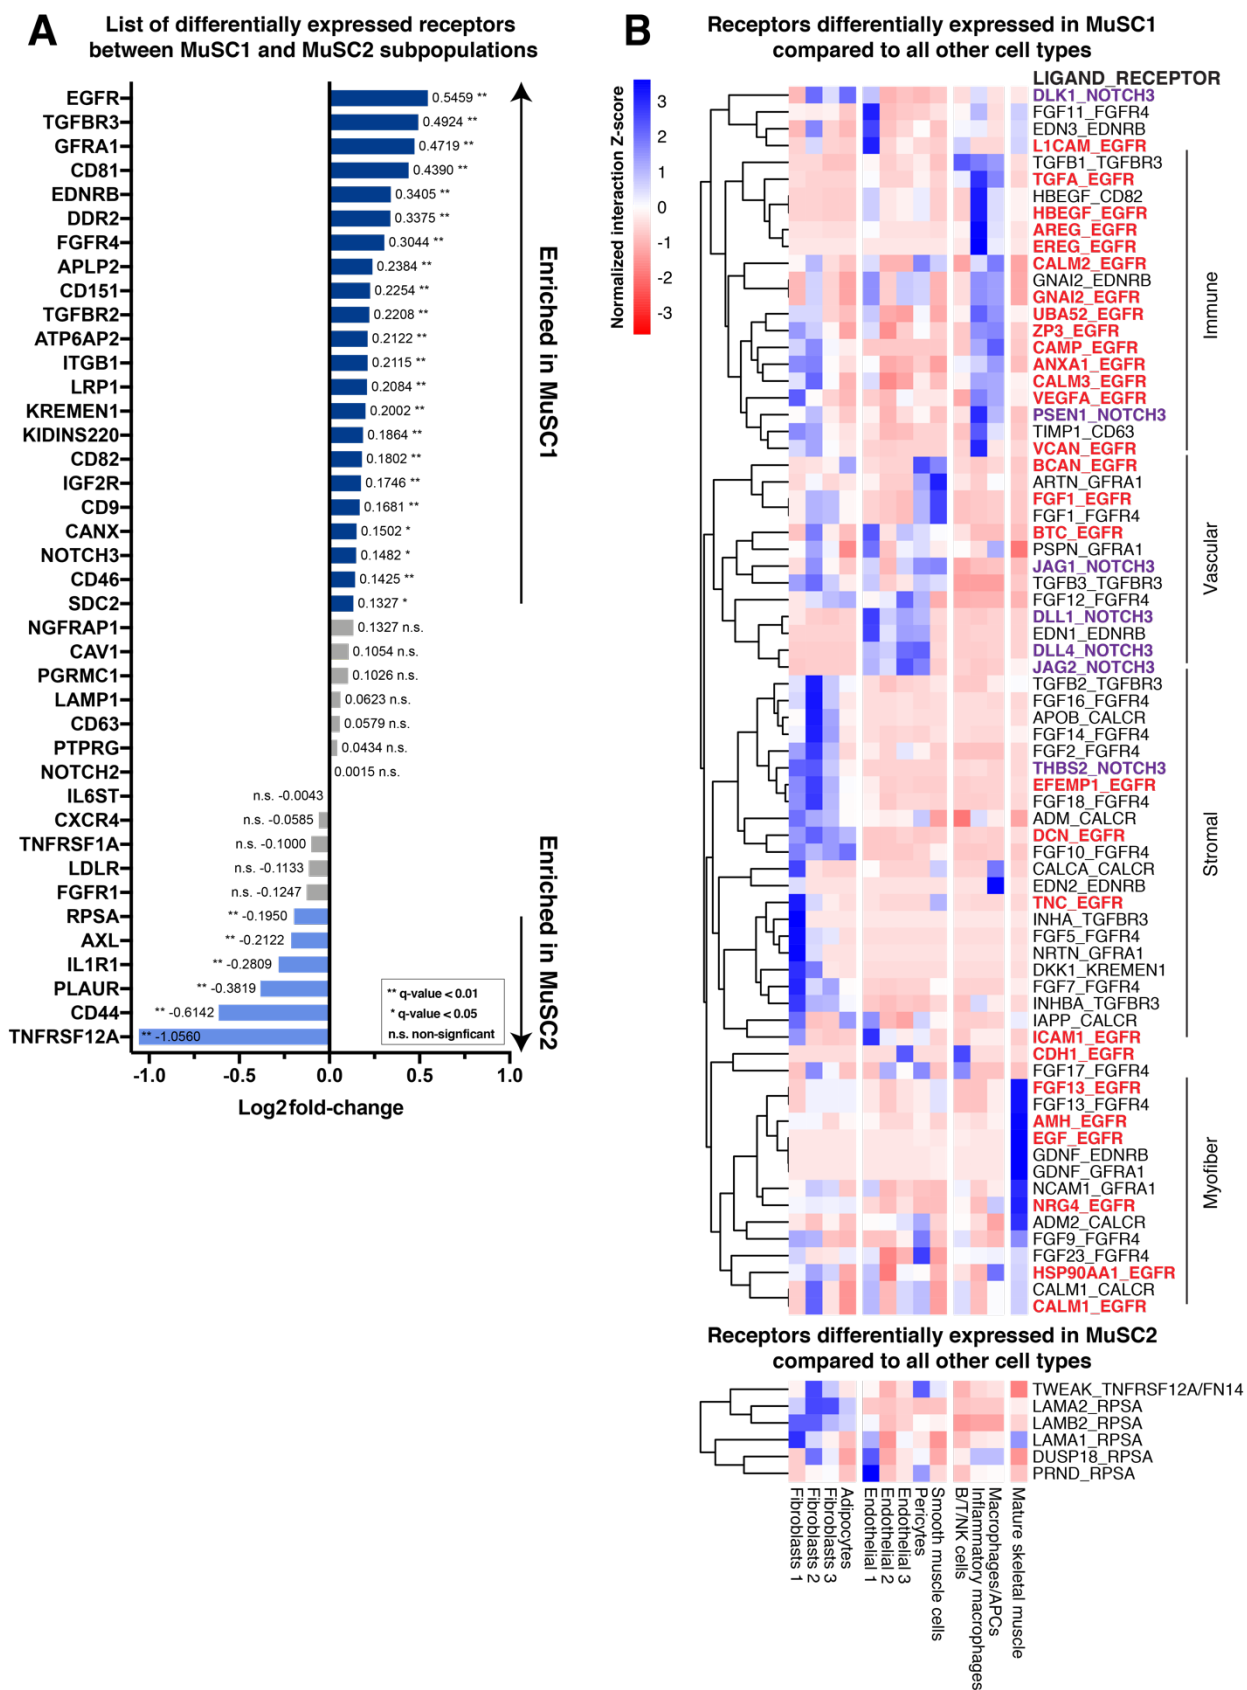

262 **Figure 3** (previous page). **Differentially expressed receptors and ligand-receptor interaction**  
263 **scores. (A)** List of differentially expressed genes between the MuSC1 and MuSC2 subpopulation  
264 ranked by  $\log_2$  fold-change in expression. Positive average values correspond to genes that are  
265 upregulated in MuSC1, whereas negative values are upregulated in MuSC2. Receptors that are  
266 statistically significant (q-value is corrected for FDR < 0.05) are colored in blue. Receptors that  
267 are not statistically significant are in grey. **(B)** Heatmap representing row-normalized (Z-score) LR  
268 interaction scores. Rows represent ligand-receptor interaction pairs in the format  
269 LIGAND\_RECEPTOR, where the receptor is either differentially expressed in the MuSC1 or  
270 MuSC2 populations compared to all the other cell types. Columns identify cell types expressing  
271 the ligand. Asterisks after the pair name also indicates that the ligand is differentially expressed  
272 by the other cell type and that interaction is likely cell-type specific. Red pairs involve the *EGFR*  
273 receptor, purple pairs the *NOTCH3* receptor. A positive value indicates that the interaction has a  
274 high score for a particular ligand and cell type compared to other cell types.  
275

276 Only two receptors, *TNFRSF12/FN14* and *RPSA*, were found differentially  
277 expressed in MuSC2 compared to other cell types. The first, *TNFRSF12/FN14*, interacts  
278 with the *TWEAK* cytokine ligand. While typically recognized to be expressed by  
279 macrophages and other immune cells (Tajrishi et al., 2014), our model suggests *TWEAK*  
280 is also expressed by the Fibroblasts 2 and Pericyte cell populations, though not in a  
281 statistically significant manner. The second, *RPSA*, is surface ribosomal protein that  
282 interacts with laminins (*LAM*), a dual-specificity phosphatase 18 (*DUSP18*), and prion  
283 protein 2 (*PRND*), which taken together may suggest various pathological processes such  
284 as prion diseases and cancer (Pampeno et al., 2014; Wu et al., 2019). Together, this  
285 ligand-receptor analysis identifies a broad set of surface markers that could refine the  
286 molecular definition of human MuSCs and their subpopulations, as well as candidate cell-  
287 communication channels differentially involved in healthy and diseased muscle tissues.

## 288 289 **Discussion**

290 Here we present an annotated multi-donor dataset consisting of 22,000 single-cell  
291 transcriptomes from 10 different donors and unique anatomical sites, some of which  
292 difficult to access outside of reconstructive surgeries. We performed single-cell RNA  
293 sequencing and the bioinformatic integration method Scanorama to examine the cellular  
294 heterogeneity across diverse adult human muscle tissue samples. We observed that  
295 Scanorama performed data integration more successfully than other approaches (**Fig.**  
296 **S1**). We describe the muscle tissue cellular heterogeneity and provide a comprehensive  
297 analysis of differentially expressed genes for 16 resolved cell subpopulations (**Fig. 1**).

298 This analysis suggests new gene markers for muscle FAPs and vascular endothelial cells  
299 that may provide unique perspective to human muscle physiology.

300 Most notably, this analysis suggests that human muscle may contain two distinct  
301 MuSC subpopulations (**Fig. 2**). Given the broad donor age range in this study, these two  
302 subpopulations may constitute a healthy and an aged/diseased MuSC pool. We conclude  
303 that the “MuSC1” subpopulation to be largely comprised of “quiescent” MuSCs, owning  
304 high levels of *PAX7*, the mitotic inhibitor *CDKN1C*, and *DLK1*. Interestingly, *DLK1* may  
305 be an important regulator for human MuSC maintenance and a marker of healthy tissue  
306 given its role in inhibiting adipogenesis (Andersen et al., 2013). Conversely, we identified  
307 in the “MuSC2” population signatures of inflammation and increased fat metabolism  
308 (*CCL2* and *CXCL1*), reduced insulin sensitivity (*IL32*), cell cycle (EIF2 Signaling terms),  
309 and muscle wasting (*TNFRSF12/FN14*), thereby suggesting that these cells may  
310 constitute an “early-activated” and possibly dysfunctional MuSC pool. These markers are  
311 consistent with prior observations that excessive fat accumulation in muscle can be  
312 attributed to obesity, diabetes, and ageing (Addison et al., 2014). In addition, we identify  
313 two upregulated lncRNAs that warrant further investigation as candidate non-coding  
314 regulators of myogenesis (Hagan et al., 2017). Moreover, the finding of two human MuSC  
315 subpopulations mirrors similar observations made from mouse muscle scRNA-seq  
316 analyses (De Micheli et al., 2019; Dell’Orso et al., 2019) and agrees with the general  
317 conceptual framework that muscle stem cells transition between quiescent, activated and  
318 cycling states (Bentzinger et al., 2013). Future studies comparative analysis of these  
319 MuSC subpopulations across species may reveal human-specific aspects of myogenesis.

320 Ligand-receptor interaction models from scRNA-seq data can help formulate new  
321 hypotheses about cell-communication channels that regulate muscle function (De Micheli  
322 et al., 2019). Identifying new MuSCs surface receptors will also help us refine MuSC  
323 purification protocols for prospective isolation studies used for *in vitro* and transplantation  
324 models. Our LR model revealed a set of 40 surface receptor genes that are distinctly  
325 expressed between MuSC1 and MuSC2, confirming some prior reports but also providing  
326 new candidate surface antigens for human MuSC subpopulation fractionation (**Fig. 3**).  
327 For example, we identify that *SDC2* may mark “quiescent” MuSCs while *CD44*,  
328 *TNFRSF12*, and *RPSA* “early-activated” MuSCs in ageing and disease contexts. In

329 addition, our model proposed 79 cell-communication signals that may act between  
330 MuSCs and other cell types; in particular with fibroblasts, myofibers and immune cells  
331 through the EGFR receptor, and with vascular cells through the NOTCH3 receptor. These  
332 interactions may be critical regulators of muscle homeostasis and should be further  
333 investigated.

334 Our study has some limitations. First, the sample size is small, and donors are very  
335 diverse, thus limiting our ability to control for age and sex. We performed differential  
336 expression and gene set enrichment analyses within the MuSC1 and MuSC2 populations  
337 between the middle-age (43-69 yo) and aged (70-81 yo) donors, but found few age-  
338 cohort specific differences (data not shown). Nevertheless, our dataset still offers a new  
339 transcriptomic cell reference atlas and computational data integration approaches as a  
340 resource to examine human muscle cell diversity in health, ageing and disease.

341 Future studies should aim at collecting muscle specimens in a more controlled  
342 manner, for example using a Bergström needle (Tarnopolsky et al., 2011; Sarver et al.,  
343 2017) from a unique anatomical site; though this would not be possible for some muscles  
344 presented in this study. These biopsies would allow for ageing and disease comparative  
345 analyses. Indeed, a recent report by Rubenstein et al. (2020) performed scRNA-seq on  
346 four human vastus lateralis muscle biopsies found that myofiber type composition and  
347 gene expression alterations based on donor age. Further, future work could also focus  
348 on collecting single-myonuclei from myofibers while discarding other non-myogenic cell  
349 types. This could illuminate the transcriptomic diversity of myofiber type, on differences  
350 that the local anatomy and tissue physiology may demonstrate, and to ultimately enrich  
351 our repertoire of know human muscle markers and understanding of its molecular  
352 regulators.

## 353 **Methods**

354

### 355 **Human participation for muscle sample collection**

356 All procedures were approved by the Institutional Review Board at Weill Cornell Medical  
357 College (WCMC IRB Protocol # 1510016712) and were performed in accordance with  
358 relevant guidelines and regulations. All specimens were obtained at the New York-  
359 Presbyterian/Weill Cornell campus. All subjects provided written informed consent prior  
360 to participation. Samples were de-identified in accordance to IRB guidelines and only  
361 details concerning age, sex, and anatomic origin were included. Sample anatomic  
362 locations and donor details are provided in **Fig. 1A**.

363

### 364 **Muscle digestion and single-cell sequencing library preparation**

365 After collection from donors during surgery, the muscle samples were cleared from  
366 excessive fat and connective tissue and weighted. About 50-65 mg of tissue was then  
367 digested into a single-cell suspension following a previously reported protocol (Spinazzola  
368 et al., 2017). Briefly, the specimen was digested in 8 mg/mL Collagenase D (Roche) and  
369 4.8 U/mL Dispase II (Roche) for 1 hr followed by manual dissociation, filtration, and red  
370 blood cell lysis. All single-cell suspensions were then frozen at -80°C in 90% FBS, 10%  
371 DMSO and were re-filtered after thawing and prior to generating scRNA-seq libraries. The  
372 sequencing libraries were prepared using the Chromium Single Cell 3' reagent V2 or V3  
373 kit (10X Genomics) in accordance with the manufacturer's protocol and diluted as to yield  
374 a recovery of ~6,000 single-cell transcriptomes with <5% doublet rate. The libraries were  
375 sequenced in multiplex (n=2 per sequencing run) on the NextSeq 500 sequencer  
376 (Illumina) to produce between 200 and 250 million reads per library.

377

### 378 **Single-cell data analysis**

379 Sequencing reads were processed with the Cell Ranger version 3.1 (10X Genomics)  
380 using the human reference transcriptome GRCh38. The downstream analysis was carried  
381 out with R 3.6.1 (2019-07-05). Quality control filtering, data clustering, visualization, and  
382 differential gene expression analysis was carried out using Seurat 3.1.0 R package. Each  
383 of the 10 datasets was first analyzed and annotated independently before integration with

384 Scanorama (Hie et al., 2019). Filtering retained cells with >1000 unique molecular  
385 identifiers (UMIs), <20% UMIs mapped to mitochondrial genes, and genes expressed in  
386 at least 3 cells. Unsupervised shared nearest neighbor (SSN) clustering was performed  
387 with a resolution of 0.4 following which clusters were annotated with a common  
388 nomenclature of 12 cell type terms (**Fig. S1**). Differential expression analysis was  
389 achieved using either Seurat's "FindAllMarkers" (**Fig. 1D**) or "FindMarkers" (**Fig. 2A**)  
390 function using a Wilcoxon Rank Sum test and only considering genes with  $>\log_2(0.25)$   
391 fold-change and expressed in at least 25% of cells in the cluster. P-values were corrected  
392 for false-discovery (FDR) and then reported as q-values. Integration of raw counts was  
393 achieved using the "scanorama.correct" function from Scanorama. The integrated values  
394 were finally scaled in Seurat regressing out the 10X chemistry type and the number of  
395 genes per cell. Visualization was done using uniform manifold approximation and  
396 projection (UMAP) (Becht et al., 2018).

397

### 398 **Pathway and gene set enrichment analysis**

399 The list of differentially expressed genes between MuSC1 and MuSC2 (Fig. 2A) was used  
400 in Ingenuity Pathway Analysis (IPA) (QUIAGEN, 2019-08-30). Activated (canonical)  
401 pathways were calculated by "Core Analysis" setting a q-value cutoff of 0.05, which  
402 yielded 964 genes (366 down, 598 up). Top canonical pathways were chosen based of  
403  $-\log(p\text{-value})$  and z-score values. Gene set enrichment analysis (GSEA, v.4.0.3)  
404 (Subramanian et al., 2005) was ran on the same gene list as IPA ranked by  $\log_2$  fold-  
405 change and with default program settings. Gene sets database used:  
406 h.all.v7.0.symbols.gmt, c2.all.v7.0.symbols.gmt, c5.all.v7.0.symbols.gmt (Broad  
407 Institute). Gene sets enriched in phenotype were selected based on q-value and  
408 enrichment score (ES).

409

### 410 **Ligand-receptor cell communication model**

411 The model aims at scoring potential ligand-receptor interactions between MuSCs  
412 (receptor) and other cell types (ligand). We used the ligand-receptor interaction database  
413 from Ramilowski et al. (2015). From the database, we considered 1915 ligand-receptor  
414 pairs (from 542 receptors and 518 ligands) to test for differential expression in our scRNA-



415 seq dataset. To calculate the score for a given ligand-receptor pair, we multiply the  
416 average receptor expression in MuSCs by the average ligand expression per other cell  
417 type. We only considered receptors that are differentially expressed in either the MuSC1  
418 or MuSC2 subpopulation when compared individually to all other cell types.

419

## 420 **Reagents and Resources**

421

| <b>Reagents</b>                                     |               |             |
|-----------------------------------------------------|---------------|-------------|
| Dispase II (neutral protease, grade II)             | Sigma-Aldrich | 04942078001 |
| Collagenase D, from <i>Clostridium histolyticum</i> | Sigma-Aldrich | 11088866001 |

422

| <b>Commercial kits</b>                            |              |                     |
|---------------------------------------------------|--------------|---------------------|
| Chromium Single Cell 3' Library & Gel Bead Kit v2 | 10X Genomics | CG00052 (protocol)  |
| Chromium Single Cell 3' Library & Gel Bead Kit v3 | 10X Genomics | CG000183 (protocol) |

423

| <b>Deposited data</b>          |                         |                                                                                                         |
|--------------------------------|-------------------------|---------------------------------------------------------------------------------------------------------|
| Human ligand-receptor database | Ramilowski et al., 2015 | <a href="https://www.ncbi.nlm.nih.gov/pubmed/26198319">https://www.ncbi.nlm.nih.gov/pubmed/26198319</a> |
| Human scRNAseq dataset         | This paper              | GSE143704                                                                                               |

424

| <b>Software packages and algorithms</b>      |                          |                                                                                                                                                                                           |
|----------------------------------------------|--------------------------|-------------------------------------------------------------------------------------------------------------------------------------------------------------------------------------------|
| Cell Ranger 3.1.0 (July 24, 2019)            | 10X Genomics             | <a href="https://support.10xgenomics.com/single-cell-gene-expression/software/downloads/latest">https://support.10xgenomics.com/single-cell-gene-expression/software/downloads/latest</a> |
| Seurat 3.1.0                                 | Stuart et al., 2019b     | <a href="https://github.com/satijalab/seurat">https://github.com/satijalab/seurat</a>                                                                                                     |
| Scanorama (online version as of 2019-11-19)  | Hie et al., 2019         | <a href="https://github.com/brianhie/scanorama">https://github.com/brianhie/scanorama</a>                                                                                                 |
| Gene Set Enrichment Analysis (4.0.3)         | Subramanian et al., 2005 | <a href="http://software.broadinstitute.org/gsea/index.jsp">http://software.broadinstitute.org/gsea/index.jsp</a>                                                                         |
| Ingenuity Pathway Analysis (IPA, 2019-08-30) | QUIAGEN                  | <a href="https://www.qiagenbioinformatics.com/products/ingenuity-pathway-analysis/">https://www.qiagenbioinformatics.com/products/ingenuity-pathway-analysis/</a>                         |

425

426 **Acknowledgements**

427 This work was financially supported by National Institutes of Health under award  
428 R01AG058630 (to B.D.C.), a Glenn Medical Research Foundation and American  
429 Federation for Aging Research Grant for Junior Faculty (to B.D.C.), and a US Department  
430 of Education Graduate Assistantship in Areas of National Need under Award  
431 P200A150273 (to A.J.D.). The content is solely the responsibility of the authors and does  
432 not necessarily represent the official views of any of these funding sources. The authors  
433 acknowledge helpful advice from colleagues in the Cosgrove and Elemento groups, as  
434 well as Christopher Mendias at the Hospital for Special Surgery and Peter Schweitzer of  
435 Genomics Facility at the Cornell University Biotechnology Resource Center. Lastly, the  
436 authors are grateful for the human tissue donors.

437

438 **Author Contributions**

439 A.J.D. and B.D.C. designed the study and wrote the manuscript. J.A.S. obtained the  
440 human tissue samples. A.J.D. performed the tissue dissociations, scRNA-seq, and data  
441 analysis, with supervision and assistance from B.D.C. and O.E. All authors reviewed and  
442 edited the manuscript.

443

444 **Declarations of Interest**

445 The authors declare no conflicts of interest.

446 **References**

447

448 Addison, O., Marcus, R.L., LaStayo, P.C., and Ryan, A.S. (2014). Intermuscular Fat: A  
449 Review of the Consequences and Causes. *International Journal of Endocrinology* 2014,  
450 1–11.

451

452 Alexander, M.S., Rozkalne, A., Colletta, A., Spinazzola, J.M., Johnson, S., Rahimov, F.,  
453 Meng, H., Lawlor, M.W., Estrella, E., Kunkel, L.M., et al. (2016). CD82 Is a Marker for  
454 Prospective Isolation of Human Muscle Satellite Cells and Is Linked to Muscular  
455 Dystrophies. *Cell Stem Cell* 19, 800–807.

456

457 Andersen, D.C., Laborda, J., Baladron, V., Kassem, M., Sheikh, S.P., and Jensen, C.H.  
458 (2013). Dual role of delta-like 1 homolog (DLK1) in skeletal muscle development and adult  
459 muscle regeneration. *Development* 140, 3743.

460

461 Becht, E., McInnes, L., Healy, J., Dutertre, C.A., Kwok, I.W.H., Ng, L.G., Ginhoux, F., and  
462 Newell, E.W. (2018). Dimensionality reduction for visualizing single-cell data using  
463 UMAP. *Nat Biotechnol.*

464

465 Bentzinger, C.F., Wang, Y.X., Dumont, N.A., and Rudnicki, M.A. (2013). Cellular  
466 dynamics in the muscle satellite cell niche. *EMBO Reports* 14, 1062–1072.

467

468 Blau, H.M., Cosgrove, B.D., and Ho, A.T.V. (2015). The central role of muscle stem cells  
469 in regenerative failure with aging. *Nature Medicine* 21, 854.

470

471 van den Brink, S.C., Sage, F., Vértesy, Á., Spanjaard, B., Peterson-Maduro, J., Baron,  
472 C.S., Robin, C., and van Oudenaarden, A. (2017). Single-cell sequencing reveals  
473 dissociation-induced gene expression in tissue subpopulations. *Nature Methods* 14, 935–  
474 936.

475

476 Burzyn, D., Kuswanto, W., Kolodin, D., Shadrach, J.L., Cerletti, M., Jang, Y., Sefik, E.,  
477 Tan, T.G., Wagers, A.J., Benoist, C., et al. (2013). A Special Population of Regulatory T  
478 Cells Potentiates Muscle Repair. *Cell* 155, 1282–1295.

479

480 Catalán, V., Gómez-Ambrosi, J., Rodríguez, A., Ramírez, B., Ortega, V.A., Hernández-  
481 Lizoain, J.L., Baixauli, J., Becerril, S., Rotellar, F., Valentí, V., et al. (2017). IL-32 $\alpha$ -  
482 induced inflammation constitutes a link between obesity and colon cancer.  
483 *Oncoimmunology* 6, e1328338–e1328338.

484

485 Cereijo, R., Gavaldà-Navarro, A., Cairó, M., Quesada-López, T., Villarroya, J., Morón-  
486 Ros, S., Sánchez-Infantes, D., Peyrou, M., Iglesias, R., Mampel, T., et al. (2018).  
487 CXCL14, a Brown Adipokine that Mediates Brown-Fat-to-Macrophage Communication in  
488 Thermogenic Adaptation. *Cell Metabolism* 28, 750-763.e6.

489

- 490 Charrin, S., Latil, M., Soave, S., Polesskaya, A., Chrétien, F., Boucheix, C., and  
491 Rubinstein, E. (2013). Normal muscle regeneration requires tight control of muscle cell  
492 fusion by tetraspanins CD9 and CD81. *Nature Communications* 4, 1674.  
493
- 494 Charville, G.W., Cheung, T.H., Yoo, B., Santos, P.J., Lee, G.K., Shrager, J.B., and  
495 Rando, T.A. (2015). Ex Vivo Expansion and In Vivo Self-Renewal of Human Muscle Stem  
496 Cells. *Stem Cell Reports* 5, 621–632.  
497
- 498 Davegårdh, C., Broholm, C., Perfilyev, A., Henriksen, T., García-Calzón, S., Peijs, L.,  
499 Hansen, N.S., Volkov, P., Kjøbsted, R., Wojtaszewski, J.F.P., et al. (2017). Abnormal  
500 epigenetic changes during differentiation of human skeletal muscle stem cells from obese  
501 subjects. *BMC Medicine* 15, 39.  
502
- 503 De Micheli, A.J., Fraczek, P., Soueid-Baumgarten, S., Ravichandran, H., De Vlaminck, I.,  
504 Elemento, O., and Cosgrove, B.D. (2019). Single-cell analysis of the muscle stem cell  
505 hierarchy identifies heterotypic communication signals involved in skeletal muscle  
506 regeneration. *BioRxiv* 671032.  
507
- 508 Dell’Orso, S., Juan, A.H., Ko, K.-D., Naz, F., Gutierrez-Cruz, G., Feng, X., and Sartorelli,  
509 V. (2019). Single-cell analysis of adult skeletal muscle stem cells in homeostatic and  
510 regenerative conditions. *Development* dev.174177.  
511
- 512 Enwere, E.K., Lacasse, E.C., Adam, N.J., and Korneluk, R.G. (2014). Role of the  
513 TWEAK-Fn14-cIAP1-NF-κB Signaling Axis in the Regulation of Myogenesis and Muscle  
514 Homeostasis. *Front Immunol* 5, 34–34.  
515
- 516 Fernández-Hernando, C., Yu, J., Dávalos, A., Prendergast, J., and Sessa, W.C. (2010).  
517 Endothelial-Specific Overexpression of Caveolin-1 Accelerates Atherosclerosis in  
518 Apolipoprotein E-Deficient Mice. *The American Journal of Pathology* 177, 998–1003.  
519
- 520 Goncharov, N.V., Nadeev, A.D., Jenkins, R.O., and Avdonin, P.V. (2017). Markers and  
521 Biomarkers of Endothelium: When Something Is Rotten in the State. *Oxidative Medicine  
522 and Cellular Longevity* 2017, 9759735.  
523
- 524 Hagan, M., Zhou, M., Ashraf, M., Kim, I.-M., Su, H., Weintraub, N.L., and Tang, Y. (2017).  
525 Long noncoding RNAs and their roles in skeletal muscle fate determination. *Noncoding  
526 RNA Investig* 1, 24.  
527
- 528 Harmon, B.T., Orkunoglu-Suer, E.F., Adham, K., Larkin, J.S., Gordish-Dressman, H.,  
529 Clarkson, P.M., Thompson, P.D., Angelopoulos, T.J., Gordon, P.M., Moyna, N.M., et al.  
530 (2010). CCL2 and CCR2 variants are associated with skeletal muscle strength and  
531 change in strength with resistance training. *J Appl Physiol* (1985) 109, 1779–1785.  
532
- 533 Hie, B., Bryson, B., and Berger, B. (2019). Efficient integration of heterogeneous single-  
534 cell transcriptomes using Scanorama. *Nature Biotechnology* 37, 685–691.  
535

536 Järvinen, T.A., Järvinen, M., and Kalimo, H. (2014). Regeneration of injured skeletal  
537 muscle after the injury. *Muscles Ligaments Tendons J* 3, 337–345.  
538

539 Karpus, O.N., Kiener, H.P., Niederreiter, B., Yilmaz-Elis, A.S., van der Kaa, J., Ramaglia,  
540 V., Arens, R., Smolen, J.S., Botto, M., Tak, P.P., et al. (2015). CD55 deposited on synovial  
541 collagen fibers protects from immune complex-mediated arthritis. *Arthritis Research &*  
542 *Therapy* 17, 6.  
543

544 Kuang, S., Chargé, S.B., Seale, P., Huh, M., and Rudnicki, M.A. (2006). Distinct roles for  
545 Pax7 and Pax3 in adult regenerative myogenesis. *J Cell Biol* 172, 103.  
546

547 Larsson, L., Degens, H., Li, M., Salvati, L., Lee, Y. il, Thompson, W., Kirkland, J.L., and  
548 Sandri, M. (2018). Sarcopenia: Aging-Related Loss of Muscle Mass and Function.  
549 *Physiological Reviews* 99, 427–511.  
550

551 Low, S., Barnes, J.L., Zammit, P.S., and Beauchamp, J.R. (2018). Delta-Like 4 Activates  
552 Notch 3 to Regulate Self-Renewal in Skeletal Muscle Stem Cells. *STEM CELLS* 36, 458–  
553 466.  
554

555 Mittal, A., Kumar, A., Lach-Trifilieff, E., Wauters, S., Li, H., Makonchuk, D., Glass, D., and  
556 Kumar, A. (2010). The TWEAK-Fn14 system is a critical regulator of denervation-induced  
557 skeletal muscle atrophy in mice. *The Journal of Cell Biology* 188, 833–849.  
558

559 Muffat, J., and Walker, D.W. (2010). Apolipoprotein D: An overview of its role in aging  
560 and age-related diseases. *Cell Cycle* 9, 269–273.  
561

562 Mylona, E., Jones, K.A., Mills, S.T., and Pavlath, G.K. (2006). CD44 regulates myoblast  
563 migration and differentiation. *Journal of Cellular Physiology* 209, 314–321.  
564

565 Pampeno, C., Derkatch, I.L., and Meruelo, D. (2014). Interaction of Human Laminin  
566 Receptor with Sup35, the [PSI<sup>+</sup>] Prion-Forming Protein from *S. cerevisiae*: A Yeast Model  
567 for Studies of LamR Interactions with Amyloidogenic Proteins. *PLoS ONE* 9, e86013.  
568

569 Pawlikowski, B., Vogler, T.O., Gadek, K., and Olwin, B.B. (2017). Regulation of skeletal  
570 muscle stem cells by fibroblast growth factors. *Developmental Dynamics* 246, 359–367.  
571

572 Pedersen, L., Olsen, C.H., Pedersen, B.K., and Hojman, P. (2012). Muscle-derived  
573 expression of the chemokine CXCL1 attenuates diet-induced obesity and improves fatty  
574 acid oxidation in the muscle. *American Journal of Physiology-Endocrinology and*  
575 *Metabolism* 302, E831–E840.  
576

577 Pisani, D.F., Clement, N., Loubat, A., Plaisant, M., Sacconi, S., Kurzenne, J.-Y.,  
578 Desnuelle, C., Dani, C., and Dechesne, C.A. (2010). Hierarchization of Myogenic and  
579 Adipogenic Progenitors Within Human Skeletal Muscle. *STEM CELLS* 28, 2182–2194.  
580

- 581 Pisconti, A., Bernet, J.D., and Olwin, B.B. (2012). Syndecans in skeletal muscle  
582 development, regeneration and homeostasis. *Muscles Ligaments Tendons J* 2, 1–9.  
583
- 584 Ramilowski, J.A., Goldberg, T., Harshbarger, J., Kloppmann, E., Lizio, M., Satagopam,  
585 V.P., Itoh, M., Kawaji, H., Carninci, P., Rost, B., et al. (2015). A draft network of ligand–  
586 receptor-mediated multicellular signalling in human. *Nature Communications* 6, 7866.  
587
- 588 Rubenstein, A.B., Smith, G.R., Raue, U., Bogue, G., Minchev, K., Ruf-Zamojski, F., Nair,  
589 V.D., Wang, X., Zhou, L., Zaslavsky, E., Trappe, T.A., Sealfon, S.C. (2020.) Single-cell  
590 transcriptional profiles of human skeletal muscle. *Scientific Reports* 10, 229.  
591
- 592 Ryall, J.G., Dell’Orso, S., Derfoul, A., Juan, A., Zare, H., Feng, X., Clermont, D., Koulonis,  
593 M., Gutierrez-Cruz, G., Fulco, M., et al. (2015). The NAD<sup>+</sup>-Dependent SIRT1  
594 Deacetylase Translates a Metabolic Switch into Regulatory Epigenetics in Skeletal  
595 Muscle Stem Cells. *Cell Stem Cell* 16, 171–183.  
596
- 597 Sarver, D.C., Sugg, K.B., Disser, N.P., Enselman, E.R.S., Awan, T.M., and Mendias, C.L.  
598 (2017). Local cryotherapy minimally impacts the metabolome and transcriptome of human  
599 skeletal muscle. *Scientific Reports* 7.  
600
- 601 Sato, S., Ogura, Y., and Kumar, A. (2014). TWEAK/Fn14 Signaling Axis Mediates  
602 Skeletal Muscle Atrophy and Metabolic Dysfunction. *Frontiers in Immunology* 5, 18.  
603
- 604 Scimeca, M., Bonanno, E., Piccirilli, E., Baldi, J., Mauriello, A., Orlandi, A., Tancredi, V.,  
605 Gasbarra, E., and Tarantino, U. (2015). Satellite Cells CD44 Positive Drive Muscle  
606 Regeneration in Osteoarthritis Patients. *Stem Cells Int* 2015, 469459–469459.  
607
- 608 Sousa-Victor, P., Gutarra, S., García-Prat, L., Rodriguez-Ubreva, J., Ortet, L., Ruiz-  
609 Bonilla, V., Jardí, M., Ballestar, E., González, S., Serrano, A.L., et al. (2014). Geriatric  
610 muscle stem cells switch reversible quiescence into senescence. *Nature* 506, 316–321.  
611
- 612 Spinazzola, J.M., and Gussoni, E. (2017). Isolation of Primary Human Skeletal Muscle  
613 Cells. *Bio-Protocol* 7, e2591.  
614
- 615 Stuart, T., and Satija, R. (2019a). Integrative single-cell analysis. *Nature Reviews*  
616 *Genetics* 20, 257–272.  
617
- 618 Stuart, T., Butler, A., Hoffman, P., Hafemeister, C., Papalexi, E., Mauck, W.M., Hao, Y.,  
619 Stoeckius, M., Smibert, P., and Satija, R. (2019b). Comprehensive Integration of Single-  
620 Cell Data. *Cell* 177, 1888-1902.e21.  
621
- 622 Subramanian, A., Tamayo, P., Mootha, V.K., Mukherjee, S., Ebert, B.L., Gillette, M.A.,  
623 Paulovich, A., Pomeroy, S.L., Golub, T.R., Lander, E.S., et al. (2005). Gene set  
624 enrichment analysis: A knowledge-based approach for interpreting genome-wide  
625 expression profiles. *Proc Natl Acad Sci USA* 102, 15545.  
626

- 627 Swanson, J.B., De Micheli, A.J., Disser, N.P., Martinez, L.M., Walker, N.R., Cosgrove,  
628 B.D., and Mendias, C.L. (2019). A single-cell transcriptional atlas identifies extensive  
629 heterogeneity in the cellular composition of tendons. *BioRxiv* 801266.  
630
- 631 Swindell, W.R., Johnston, A., Xing, X., Little, A., Robichaud, P., Voorhees, J.J., Fisher,  
632 G., and Gudjonsson, J.E. (2013). Robust shifts in S100a9 expression with aging: A novel  
633 mechanism for chronic inflammation. *Scientific Reports* 3, 1215.  
634
- 635 Tajrishi, M.M., Zheng, T.S., Burkly, L.C., and Kumar, A. (2014). The TWEAK-Fn14  
636 pathway: A potent regulator of skeletal muscle biology in health and disease. *Cytokine &*  
637 *Growth Factor Reviews* 25, 215–225.  
638
- 639 Tarnopolsky, M.A., Pearce, E., Smith, K., and Lach, B. (2011). Suction-modified  
640 Bergström muscle biopsy technique: Experience with 13,500 procedures. *Muscle & Nerve*  
641 43, 716–725.  
642
- 643 Uezumi, A., Nakatani, M., Ikemoto-Uezumi, M., Yamamoto, N., Morita, M., Yamaguchi,  
644 A., Yamada, H., Kasai, T., Masuda, S., Narita, A., et al. (2016). Cell-Surface Protein  
645 Profiling Identifies Distinctive Markers of Progenitor Cells in Human Skeletal Muscle.  
646 *Stem Cell Reports* 7, 263–278.  
647
- 648 Volonte, D., Liu, Y., and Galbiati, F. (2004). The modulation of caveolin-1 expression  
649 controls satellite cell activation during muscle repair. *The FASEB Journal* 19, 237–239.  
650
- 651 Waddell, J.N., Zhang, P., Wen, Y., Gupta, S.K., Yevtodiyenko, A., Schmidt, J.V., Bidwell,  
652 C.A., Kumar, A., and Kuang, S. (2010). Dlk1 Is Necessary for Proper Skeletal Muscle  
653 Development and Regeneration. *PLOS ONE* 5, e15055.  
654
- 655 Wang, Y.X., Feige, P., Brun, C.E., Hekmatnejad, B., Dumont, N.A., Renaud, J.-M.,  
656 Faulkes, S., Guindon, D.E., and Rudnicki, M.A. (2019). EGFR-Aurka Signaling Rescues  
657 Polarity and Regeneration Defects in Dystrophin-Deficient Muscle Stem Cells by  
658 Increasing Asymmetric Divisions. *Cell Stem Cell* 24, 419–432.e6.  
659
- 660 Watson, C., Whittaker, S., Smith, N., Vora, A.J., Dumonde, D.C., & Brown, K.A. (1996).  
661 IL-6 acts on endothelial cells to preferentially increase their adherence for lymphocytes.  
662 *Clinical and experimental immunology*, 105 1, 112-9.  
663
- 664 Wu, Y., Tan, X., Liu, P., Yang, Y., Huang, Y., Liu, X., Meng, X., Yu, B., Wu, M., and Jin,  
665 H. (2019). ITGA6 and RPSA synergistically promote pancreatic cancer invasion and  
666 metastasis via PI3K and MAPK signaling pathways. *Experimental Cell Research* 379, 30–  
667 47.  
668
- 669 Zhang, L., Uezumi, A., Kaji, T., Tsujikawa, K., Andersen, D.C., Jensen, C.H., and Fukada,  
670 S. (2019). Expression and Functional Analyses of Dlk1 in Muscle Stem Cells and  
671 Mesenchymal Progenitors during Muscle Regeneration. *International Journal of*  
672 *Molecular Sciences* 20, 3269.

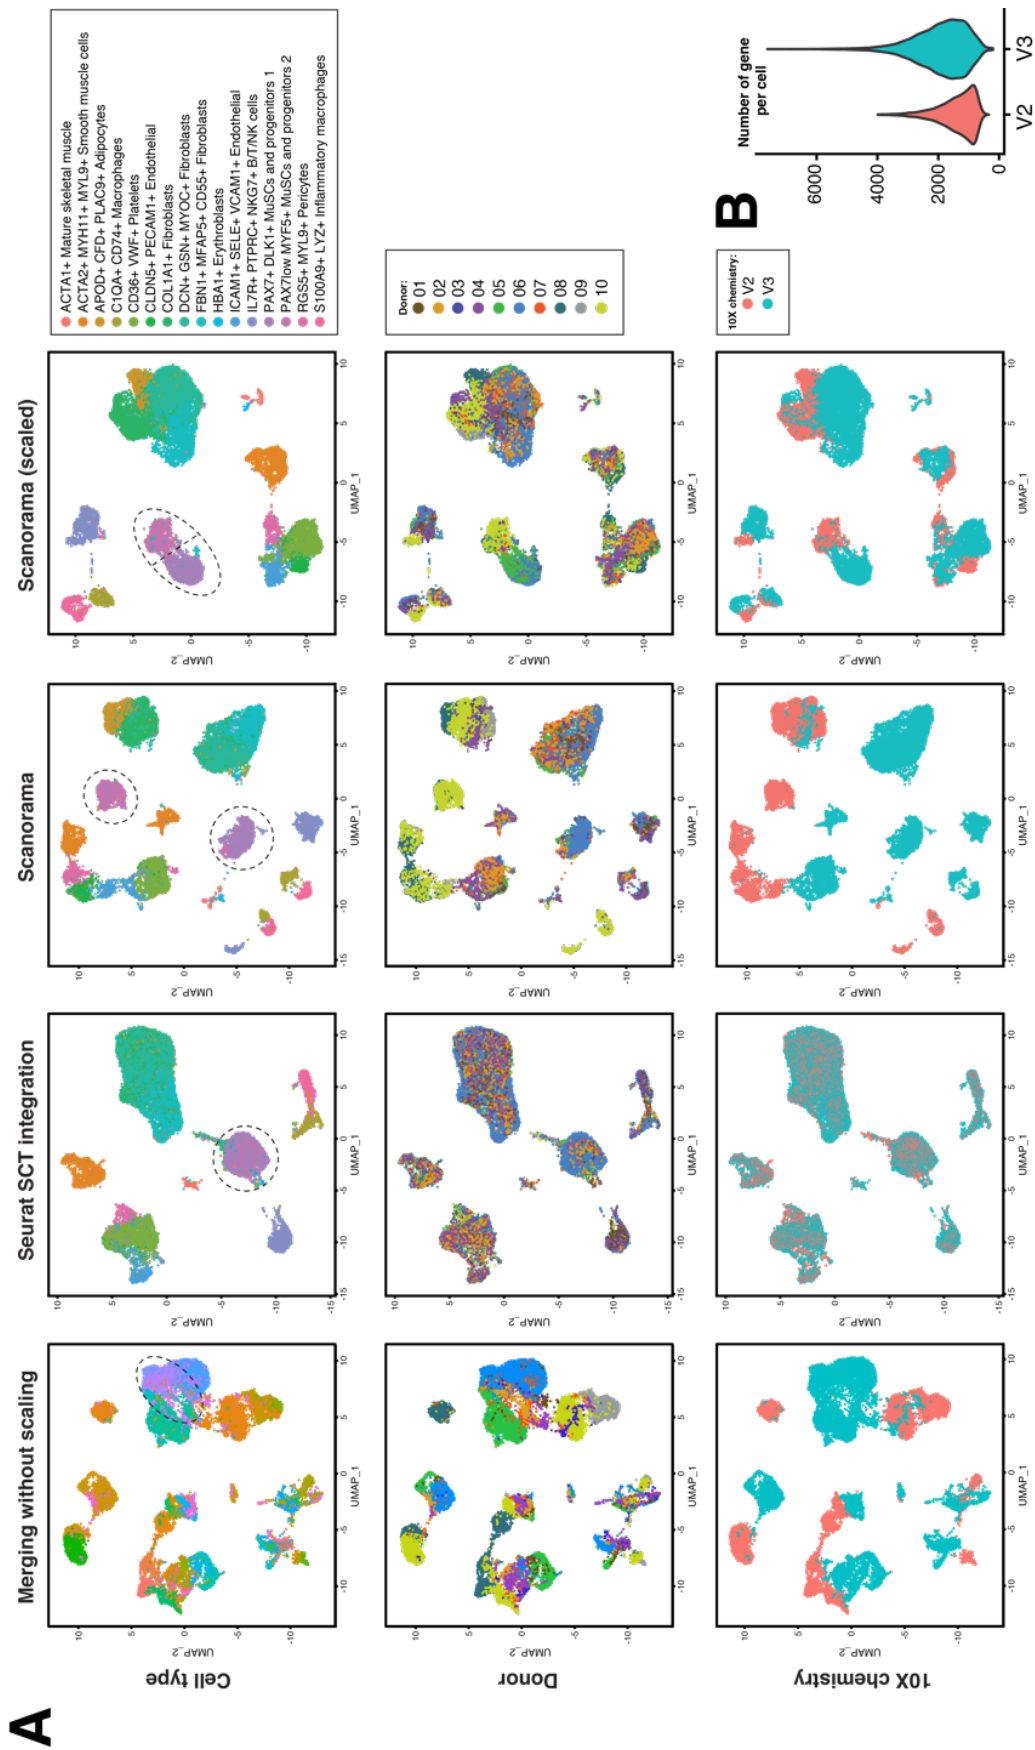



674 **Figure S1.** (previous page) **Comparison of scRNA-seq integration and batch correction**  
675 **methods.** We compared four scRNA-seq data integration methods to evaluate which most  
676 faithfully conserves donor, anatomical, and biological information while minimizes technical  
677 biases. **(A)** The n=10 donor datasets were first annotated independently using a nomenclature of  
678 12 common cell type terms following unsupervised SNN clustering. Then we evaluated the  
679 integration method by UMAP and by coloring the data either by cell type, donor ID, or 10X library  
680 chemistry used. *First*, we integrated the data by merging the individually normalized gene  
681 expression matrices without any further correction. We saw strong technical biases that  
682 overwhelmed biological information as the different cell populations segregate by sample/donor  
683 and chemistry type. For instance, the two MuSC and progenitor subpopulations are grouped with  
684 fibroblasts and endothelial cells. *Second*, we tested the Seurat SCT integration method (Stuart et  
685 al., 2019b). This method first calculates a cross-correlation subspace from genes that are shared  
686 between datasets. We noticed that this method better “aligns” donor and chemistry type but at  
687 the expense of masking biological variability. For instance, we observed that the two MuSC and  
688 four stromal subpopulations (Fibroblast 1,2,3 and Adipocytes) were grouped together, hiding  
689 important biological heterogeneity. Although certainly useful to validate reproducibility in scRNA-  
690 seq experiments, the Seurat SCT integration approach overcorrected biological heterogeneity for  
691 heterogeneous samples. *Third*, we tested the Scanorama method (Hie et al., 2019), which relies  
692 on a computer vision algorithm that “stitches” datasets together even when the cell type  
693 composition between dataset is considerably different. We see that this method groups similar  
694 cell populations together while acknowledging donor differences. Yet, surprisingly, this method is  
695 also very sensitive at picking up differences in chemistry. To correct this chemistry effect, we  
696 scaled the Scanorama output by regressing out the chemistry and the number of genes detected  
697 per cell (significantly different between chemistry type) **(B)**. Using this integration method, we  
698 observed clear separation of the independently annotated cell populations. We present the  
699 resulting Scanorama-integrated dataset as a “consensus atlas” (see **Fig. 1B-C**) of human muscle  
700 that describes donor-to-donor differences while grouping cells that are similar together and  
701 removing technical biases.
